---

## Correction

*Ca<sup>2+</sup>-dependent modulation of GABA<sub>A</sub> and NMDA receptors by extracellular ATP: implication for function of tripartite synapse*

By ULYANA LALO, JEMMA ANDREW, OLEG PALYGIN and YURIY PANKRATOV

In this paper, in Figure 2(C) and its legend, the incorrect drug name has been featured. The drug used in the experiment described in Figure 2(C) was staurosporine rather than K-252c (staurosporine aglycone or staurosporinone). The last sentence of the legend to Figure 2(C) should read “Inhibition was not altered by an antagonist of phosphatase II (cyclosporin A), but was dramatically reduced by an antagonist of PKA (staurosporine) and high levels of intracellular EGTA.”
